# Supplementary material
Source: publisher figshare collection journal article supplement (https://asha.figshare.com/articles/dataset/_/6534473)
Supplement: Supplementary file 1 [file 4]

## Supplemental Material S2.

Search history run on CINAHL Plus (EBSCO HOST) database (1937 to current) on May 20, 2017.

| Search ID # | Search key words                                                                                                                                                                                                                                                                                                                                                                                                                                                                                   | Number of retrieved results |
|-------------|----------------------------------------------------------------------------------------------------------------------------------------------------------------------------------------------------------------------------------------------------------------------------------------------------------------------------------------------------------------------------------------------------------------------------------------------------------------------------------------------------|-----------------------------|
| S7          | S5 OR S6                                                                                                                                                                                                                                                                                                                                                                                                                                                                                           | 56                          |
| S6          | S1 AND S2 AND S3                                                                                                                                                                                                                                                                                                                                                                                                                                                                                   | 37                          |
| S5          | S1 AND S2 AND S4                                                                                                                                                                                                                                                                                                                                                                                                                                                                                   | 46                          |
| S4          | Rehabilitation OR fitting OR "follow up" OR "follow-up" OR "outcome assessments" OR "outcomes assessments" OR "outcomes assessment" OR "outcome assessment" OR consultation OR consultations OR "face-to-face" OR intervention OR counselling OR counseling OR "fine-tune" OR "fine-tuning" OR tuning OR adjustment OR adjustments OR programming                                                                                                                                                  | 658,942                     |
| S3          | Audiolog*                                                                                                                                                                                                                                                                                                                                                                                                                                                                                          | 57,105                      |
| S2          | "hearing aid" OR "hearing-aid" OR "hearing aids" OR "hearing-aids"                                                                                                                                                                                                                                                                                                                                                                                                                                 | 8,758                       |
| S1          | Telemedicine OR ehealth OR "e_health" OR "e-health" OR teleintervention OR tele-intervention OR mhealth Or "m-health" OR "m_health" OR telehealth OR "tele-health" OR teleaudiology OR "tele-audiology" OR teleconsultation OR "tele-consultation" OR telefitting OR "tele-fitting" OR remote OR telerehabilitation OR "tele-rehabilitation" OR telepractice OR "tele-practice" OR "telehearing" OR "tele-hearing" OR teleintervention OR tele-intervention OR mhealth Or "m-health" OR "m_health" | 31,124                      |

Search history run on Ovid EMBASE database (1946 to current) on May 20, 2017.

| <b>Search ID #</b> | <b>Search Mesh Terms</b>                | <b>Number of retrieved results</b> |
|--------------------|-----------------------------------------|------------------------------------|
| 1                  | exp telemedicine/                       | 7,835                              |
| 2                  | exp computer communication networks/    | 14,168                             |
| 3                  | exp remote consultation/                | 7,678                              |
| 4                  | 1 or 2 or 3                             | 40,761                             |
| 5                  | exp hearing aids/                       | 203,678                            |
| 6                  | exp audiology/                          | 5,387                              |
| 7                  | exp "correction of hearing impairment"/ | 3,024                              |
| 8                  | exp "continuity of patient care"/       | 651,234                            |
| 9                  | exp treatment outcome/                  | 1,248,131                          |
| 10                 | exp patient outcome assessment/         | 370,650                            |
| 11                 | exp "quality of health care"/           | 2,478,012                          |
| 12                 | exp "delivery of health care"/          | 2,587,676                          |
| 13                 | 7 or 8 or 9 or 10 or 11 or 12           | 4,599,159                          |
| 14                 | 4 and 5 and 13                          | 28                                 |
| 15                 | 4 and 5 and 6                           | 4                                  |
| 16                 | 14 or 15                                | 28                                 |
